# Supplementary material for: Estrogen Receptor-α Suppresses Liver Carcinogenesis and Establishes Sex-Specific Gene Expression
Source: MDPI journal article supplement (doi:10.3390/cancers13102355), 2021-05-13
Supplement: s1 [file s1]

# Supplementary Materials: Estrogen Receptor- $\alpha$ suppresses liver carcinogenesis and establishes sex-specific gene expression

**Table S1.** Morphometric analysis of mice used in tumor study.

|                                      | Number of mice | Body weight (g)              | Liver weight (g)             | Liver/body weight              | Uterus weight (mg)        |
|--------------------------------------|----------------|------------------------------|------------------------------|--------------------------------|---------------------------|
| Wild-type ( <i>Esr1</i> littermates) | 30             | 36.4 $\pm$ 5.5 <sup>a</sup>  | 1.74 $\pm$ 0.57 <sup>a</sup> | 0.050 $\pm$ 0.024 <sup>a</sup> | 125 $\pm$ 38 <sup>a</sup> |
| <i>Esr1</i> +/-                      | 31             | 35.5 $\pm$ 6.0 <sup>ab</sup> | 1.86 $\pm$ 0.69 <sup>a</sup> | 0.053 $\pm$ 0.021 <sup>a</sup> | 129 $\pm$ 70 <sup>a</sup> |
| <i>Esr1</i> -/-                      | 23             | 32.8 $\pm$ 5.9 <sup>b</sup>  | 4.26 $\pm$ 1.94 <sup>b</sup> | 0.132 $\pm$ 0.059 <sup>b</sup> | 40 $\pm$ 27 <sup>b</sup>  |
| Wild-type ( <i>Esr2</i> littermates) | 29             | 37.1 $\pm$ 6.2 <sup>a</sup>  | 2.06 $\pm$ 1.39 <sup>a</sup> | 0.058 $\pm$ 0.050 <sup>a</sup> | 173 $\pm$ 70 <sup>a</sup> |
| <i>Esr2</i> +/-                      | 21             | 40.2 $\pm$ 5.3 <sup>ab</sup> | 1.79 $\pm$ 0.53 <sup>a</sup> | 0.046 $\pm$ 0.020 <sup>a</sup> | 136 $\pm$ 51 <sup>a</sup> |
| <i>Esr2</i> -/-                      | 27             | 43.3 $\pm$ 7.4 <sup>b</sup>  | 2.21 $\pm$ 1.01 <sup>a</sup> | 0.052 $\pm$ 0.023 <sup>a</sup> | 142 $\pm$ 62 <sup>a</sup> |

Abbreviations: *Esr1*, estrogen receptor- $\alpha$ ; *Esr2*, estrogen receptor- $\beta$ . Body weight, liver weight, liver/body ratio, and uterus weight are shown as the mean  $\pm$  standard deviation. Statistical analysis was carried out for the *Esr1* and *Esr2* groups separately. Pairwise comparison using Wilcoxon rank sum test with correction for multiple samples (FDR) was used to test for differences.  $p < 0.05$  was considered significant. Different letters indicate statistically significant differences between groups.

**Table S2.** Transcripts with at least 5-fold differential expression between wild-type females compared to global estrogen receptor- $\alpha$  knockout females and corresponding sex-specific expression.

|                    | (B6 Background)<br>WT Females vs. <i>Esr1</i> KO<br>Females |                                   | (B6 Background)<br>WT Females ><br>WT Males |                                   | (B6;FVB Background) WT Fe-<br>males ><br>WT males |                                   |                           |
|--------------------|-------------------------------------------------------------|-----------------------------------|---------------------------------------------|-----------------------------------|---------------------------------------------------|-----------------------------------|---------------------------|
|                    | Higher in WT fe-<br>males                                   | Fold<br>Change                    | Adjusted <i>p</i> -<br>value                | Fold<br>Chan<br>ge                | Adjusted <i>p</i> -<br>value                      | Fold<br>Chan<br>ge                | Adjusted <i>p</i> - value |
| 1) <i>Sult3a1</i>  | 98                                                          | <i>p</i> = 1.14×10 <sup>-14</sup> | 466                                         | <i>p</i> = 2.68×10 <sup>-24</sup> | 1129                                              | <i>p</i> = 2.05×10 <sup>-13</sup> |                           |
| 2) <i>Cyp3a44</i>  | 37                                                          | <i>p</i> = 1.07×10 <sup>-13</sup> | 59                                          | <i>p</i> = 1.03×10 <sup>-19</sup> | 213                                               | <i>p</i> = 9.31×10 <sup>-13</sup> |                           |
| 3) <i>A1bg</i>     | 24                                                          | <i>p</i> = 1.33×10 <sup>-9</sup>  | 57                                          | <i>p</i> = 7.82×10 <sup>-17</sup> | 145                                               | <i>p</i> = 1.98×10 <sup>-9</sup>  |                           |
| 4) <i>Fmo3</i>     | 23                                                          | <i>p</i> = 1.38×10 <sup>-11</sup> | 245                                         | <i>p</i> = 8.47×10 <sup>-26</sup> | 265                                               | <i>p</i> = 5.79×10 <sup>-13</sup> |                           |
| 5) C730007P19Rik   | 20                                                          | <i>p</i> = 9.02×10 <sup>-7</sup>  | 234                                         | <i>p</i> = 4.37×10 <sup>-19</sup> | 1163                                              | <i>p</i> = 1.01                   |                           |
| 6) 1700051K22Rik   | 20                                                          | <i>p</i> = 1.90×10 <sup>-11</sup> | 48                                          | <i>p</i> = 1.24×10 <sup>-19</sup> | 26                                                | <i>p</i> = 1.33×10 <sup>-6</sup>  |                           |
| 7) BC014805        | 14                                                          | <i>p</i> = 3.07×10 <sup>-10</sup> | 110                                         | <i>p</i> = 1.50×10 <sup>-24</sup> | 54                                                | <i>p</i> = 2.98×10 <sup>-9</sup>  |                           |
| 8) AI315523        | 14                                                          | <i>p</i> = 4.08×10 <sup>-19</sup> | 115                                         | <i>p</i> = 3.63×10 <sup>-23</sup> | 192                                               | <i>p</i> = 2.51×10 <sup>-12</sup> |                           |
| 9) <i>Hao3</i>     | 12                                                          | <i>p</i> = 3.11×10 <sup>-8</sup>  | 166                                         | <i>p</i> = 4.90×10 <sup>-24</sup> | 157                                               | <i>p</i> = 1.68×10 <sup>-11</sup> |                           |
| 10) <i>Cutl2</i>   | 8.5                                                         | <i>p</i> = 1.96×10 <sup>-11</sup> | 19                                          | <i>p</i> = 1.00×10 <sup>-20</sup> | 7.3                                               | <i>p</i> = 2.93×10 <sup>-5</sup>  |                           |
| 11) <i>Cyp2b9</i>  | 8.5                                                         | <i>p</i> = 1.24×10 <sup>-13</sup> | 35                                          | <i>p</i> = 2.16×10 <sup>-27</sup> | 8.3                                               | <i>p</i> = 1.95×10 <sup>-6</sup>  |                           |
| 12) <i>Cyp2b13</i> | 8.0                                                         | <i>p</i> = 1.59×10 <sup>-7</sup>  | 41                                          | <i>p</i> = 3.56×10 <sup>-20</sup> | 23                                                | <i>p</i> = 1.86×10 <sup>-6</sup>  |                           |
| 13) 9030619P08Rik  | 7.8                                                         | <i>p</i> = 6.19×10 <sup>-19</sup> | 12                                          | <i>p</i> = 1.38×10 <sup>-27</sup> | 5.1                                               | <i>p</i> = 1.38×10 <sup>-7</sup>  |                           |
| 14) D630002G06Rik  | 7.1                                                         | <i>p</i> = 1.54×10 <sup>-7</sup>  | 43                                          | <i>p</i> = 1.67×10 <sup>-21</sup> | 14                                                | <i>p</i> = 1.16×10 <sup>-5</sup>  |                           |
| 15) <i>Esr1</i>    | 7.0                                                         | <i>p</i> = 1.53×10 <sup>-16</sup> | 4.5                                         | <i>p</i> = 4.71×10 <sup>-15</sup> | 3.1                                               | <i>p</i> = 8.63×10 <sup>-4</sup>  |                           |
| 16) C730036D15Rik  | 6.8                                                         | <i>p</i> = 4.71×10 <sup>-14</sup> | 8.0                                         | <i>p</i> = 1.96×10 <sup>-19</sup> | 4.8                                               | <i>p</i> = 6.09×10 <sup>-5</sup>  |                           |
| 17) <i>Aldh3b2</i> | 5.7                                                         | <i>p</i> = 4.96×10 <sup>-8</sup>  | 4.9                                         | <i>p</i> = 1.15×10 <sup>-9</sup>  | 8.7                                               | <i>p</i> = 2.00×10 <sup>-5</sup>  |                           |

|                                                             |                |                              |                                             |                              |                                                 |                           |
|-------------------------------------------------------------|----------------|------------------------------|---------------------------------------------|------------------------------|-------------------------------------------------|---------------------------|
| 18) <i>Rshl3</i>                                            | 5.4            | $p = 4.13 \times 10^{-7}$    | 11                                          | $p = 3.77 \times 10^{-15}$   | 11                                              | $p = 2.59 \times 10^{-6}$ |
| 19) <i>Mt2</i>                                              | 5.3            | $p = 0.0013$                 | 11                                          | $p = 2.05 \times 10^{-9}$    | N/A                                             | $p > 0.05$                |
| 20) <i>Ly6c</i>                                             | 5.2            | $p = 1.35 \times 10^{-15}$   | 7.4                                         | $p = 3.00 \times 10^{-23}$   | 3.6                                             | $p = 5.33 \times 10^{-5}$ |
| 21) <i>Npal1</i>                                            | 5.1            | $p = 2.60 \times 10^{-7}$    | 17                                          | $p = 1.98 \times 10^{-19}$   | 5.5                                             | $p = 1.05 \times 10^{-3}$ |
| 22) 1810053B23Rik                                           | 5.1            | $p = 0.0068$                 | 6.4                                         | $p = 2.04 \times 10^{-5}$    | N/A                                             | $p > 0.05$                |
| 23) AI851790                                                | 5.0            | $p = 0.00015$                | 10                                          | $p = 6.58 \times 10^{-11}$   | 4.9                                             | $p = 0.044$               |
| <hr/>                                                       |                |                              |                                             |                              |                                                 |                           |
| (B6 background)<br>WT females vs. <i>Esr1</i> KO<br>females |                |                              | (B6 background)<br>WT males ><br>WT females |                              | (B6;FVB background)<br>WT males ><br>WT females |                           |
| Higher in <i>Esr1</i> KO<br>females                         | Fold<br>Change | Adjusted <i>p</i> -<br>value | Fold<br>Change                              | Adjusted <i>p</i> -<br>value | Fold<br>Change                                  | Adjusted <i>p</i> -value  |
| 1) <i>Cml5</i>                                              | 46             | $p = 3.07 \times 10^{-10}$   | 77                                          | $p = 9.96 \times 10^{-16}$   | 71                                              | $p = 4.90 \times 10^{-5}$ |
| 2) <i>Cyp4a12</i>                                           | 20             | $p = 6.31 \times 10^{-18}$   | 26                                          | $p = 4.62 \times 10^{-24}$   | 29                                              | $p = 1.05 \times 10^{-6}$ |
| 3) <i>Cml4</i>                                              | 15             | $p = 7.37 \times 10^{-19}$   | 15                                          | $p = 7.69 \times 10^{-24}$   | 18                                              | $p = 5.08 \times 10^{-8}$ |
| 4) <i>Cabyr</i>                                             | 14             | $p = 1.17 \times 10^{-13}$   | 18                                          | $p = 4.34 \times 10^{-19}$   | 12                                              | $p = 1.79 \times 10^{-5}$ |
| 5) <i>Cfd</i>                                               | 12             | $p = 0.0046$                 | 26                                          | $p = 5.59 \times 10^{-7}$    | 30                                              | $p = 0.046$               |
| 6) <i>Cspg5</i>                                             | 9.1            | $p = 1.83 \times 10^{-6}$    | 13                                          | $p = 4.36 \times 10^{-11}$   | 15                                              | $p = 1.95 \times 10^{-3}$ |
| 7) <i>Scara5</i>                                            | 7.7            | $p = 3.74 \times 10^{-6}$    | 19                                          | $p = 1.38 \times 10^{-13}$   | 9.1                                             | $p = 0.011$               |
| 8) <i>Olig1</i>                                             | 7.1            | $p = 8.21 \times 10^{-10}$   | 8.5                                         | $p = 2.41 \times 10^{-14}$   | N/A                                             | $p > 0.05$                |
| 9) 2610305D13Rik                                            | 7.1            | $p = 7.23 \times 10^{-7}$    | 9.1                                         | $p = 4.28 \times 10^{-11}$   | 7.7                                             | $p = 2.31 \times 10^{-3}$ |
| 10) <i>Omd</i>                                              | 7.1            | $p = 9.92 \times 10^{-10}$   | 8.3                                         | $p = 1.41 \times 10^{-14}$   | 12                                              | $p = 3.29 \times 10^{-6}$ |
| 11) NAP025923-1                                             | 6.7            | $p = 0.0028$                 | 11                                          | $p = 4.87 \times 10^{-7}$    | N/A                                             | $p > 0.05$                |
| 12) <i>Mthfd1l</i>                                          | 6.7            | $p = 2.72 \times 10^{-8}$    | 2.8                                         | $p = 9.65 \times 10^{-5}$    | N/A                                             | $p > 0.05$                |
| 13) <i>Elovl3</i>                                           | 6.7            | $p = 1.23 \times 10^{-9}$    | 8.3                                         | $p = 5.32 \times 10^{-15}$   | 7.1                                             | $p = 6.75 \times 10^{-4}$ |
| 14) <i>C6</i>                                               | 6.3            | $p = 1.45 \times 10^{-12}$   | 10                                          | $p = 1.09 \times 10^{-20}$   | 9.1                                             | $p = 5.13 \times 10^{-8}$ |
| 15) <i>Meig1</i>                                            | 6.3            | $p = 1.50 \times 10^{-5}$    | 7.1                                         | $p = 4.25 \times 10^{-9}$    | 7.1                                             | $p = 8.38 \times 10^{-3}$ |
| 16) <i>Tff3</i>                                             | 5.9            | $p = 3.27 \times 10^{-6}$    | 8.3                                         | $p = 2.68 \times 10^{-11}$   | N/A                                             | $p > 0.05$                |
| 17) <i>Hsd3b5</i>                                           | 5.6            | $p = 9.16 \times 10^{-12}$   | 9.1                                         | $p = 1.15 \times 10^{-19}$   | 17                                              | $p = 8.43 \times 10^{-9}$ |
| 18) <i>Dnase1</i>                                           | 5.6            | $p = 3.94 \times 10^{-7}$    | 3.8                                         | $p = 5.20 \times 10^{-7}$    | 5.6                                             | $p = 3.26 \times 10^{-3}$ |
| 19) <i>Cib3</i>                                             | 5.3            | $p = 0.00043$                | 3.2                                         | $p = 0.0016$                 | N/A                                             | $p > 0.05$                |
| 20) AK046232                                                | 5.3            | $p = 0.00014$                | 7.7                                         | $p = 4.62 \times 10^{-9}$    | 6.7                                             | $p = 9.97 \times 10^{-3}$ |
| 21) <i>Hsd3b4</i>                                           | 5.3            | $p = 3.91 \times 10^{-9}$    | 8.3                                         | $p = 2.44 \times 10^{-16}$   | 20                                              | $p = 2.95 \times 10^{-8}$ |
| 22) <i>Ntrk1</i>                                            | 5.0            | $p = 0.00079$                | 3.7                                         | $p = 0.00037$                | 6.3                                             | $p = 0.045$               |

Abbreviations: B6, C57BL/6J; WT, wild-type; *Esr1*KO, estrogen receptor- $\alpha$  knockout. Fold change represents microarray results from hepatic RNA of mice sacrificed at 9–10 weeks of age. The adjusted *P* value for each transcript is listed. For the *Esr1*KO, the WT females, and the WT males group (B6 background) the microarrays were run with a pool of hepatic RNA. The WT females group (B6 background) is composed of B6 females ( $n = 18$ ) and the WT female littermates of the estrogen receptor- $\alpha$  ( $n = 6$ ) and estrogen receptor- $\beta$  ( $n = 6$ ) mice. The WT males group (B6 background) is composed of B6 males ( $n = 15$ ) and WT male littermates of the estrogen receptor- $\alpha$  ( $n = 6$ ) and estrogen receptor- $\beta$  ( $n = 6$ ) mice. *Esr1*KO females are represented by intact individuals ( $n = 6$ ) and females that underwent a sham operation ( $n = 6$ ). For the B6;FVB mixed background groups we show results from three individual animals, where the WT males and WT females groups are littermates of the liver estrogen receptor- $\alpha$  knockout (LERKO) animals.

**Table 3.** Morphometric analysis of mice used in gene expression study.

|                                 | No. mice | Body weight (g)         | Liver weight (g)           | Liver/body weight              | body weight (mg)       | Uterus weight (mg)       | Estrogen (pg/ml) |
|---------------------------------|----------|-------------------------|----------------------------|--------------------------------|------------------------|--------------------------|------------------|
| Female wild-type                | 40       | 20 ± 1.8 <sup>ab</sup>  | 0.90 ± 0.091 <sup>b</sup>  | 0.046 ± 0.0047 <sup>ef</sup>   | 70 ± 27 <sup>c</sup>   | 59 ± 76 <sup>ab**</sup>  |                  |
| Ovariectomy + E <sub>2</sub>    | 6        | 20 ± 0.85 <sup>ab</sup> | 1.0 ± 0.078 <sup>cde</sup> | 0.051 ± 0.0040 <sup>f</sup>    | 72 ± 14 <sup>bc</sup>  | 680 ± 240 <sup>c**</sup> |                  |
| Ovariectomy                     | 11       | 23 ± 1.6 <sup>c</sup>   | 1.0 ± 0.067 <sup>cde</sup> | 0.046 ± 0.0035 <sup>def</sup>  | 28 ± 29 <sup>ab*</sup> | 31 ± 9.3 <sup>ab**</sup> |                  |
| Female <i>Esr1</i> heterozygous | 6        | 21 ± 1.3 <sup>bc</sup>  | 0.85 ± 0.14 <sup>bcd</sup> | 0.040 ± 0.0051 <sup>bcd</sup>  | 82 ± 18 <sup>c</sup>   | 35 ± 10 <sup>ab</sup>    |                  |
| Female <i>Esr1</i> knockout     | 14       | 26 ± 2.0 <sup>d</sup>   | 1.1 ± 0.13 <sup>e</sup>    | 0.041 ± 0.0045 <sup>ab</sup>   | 23 ± 8.4 <sup>a</sup>  | 54 ± 22 <sup>b</sup>     |                  |
| Female LERKO                    | 3        | 21 ± 1.6 <sup>bc</sup>  | 1.1 ± 0.18 <sup>bcd</sup>  | 0.050 ± 0.0049 <sup>cdef</sup> | 82 ± 33 <sup>bc</sup>  | N/A                      |                  |
| Female <i>Esr2</i> heterozygous | 6        | 22 ± 0.88 <sup>c</sup>  | 0.83 ± 0.098 <sup>ab</sup> | 0.038 ± 0.0048 <sup>abc</sup>  | 77 ± 26 <sup>bc</sup>  | 42 ± 14 <sup>ab</sup>    |                  |
| Female <i>Esr2</i> knockout     | 14       | 23 ± 1.8 <sup>c</sup>   | 1.0 ± 0.10 <sup>cde</sup>  | 0.044 ± 0.0053 <sup>bcd</sup>  | 82 ± 28 <sup>c</sup>   | 30 ± 4 <sup>a**</sup>    |                  |
| Male wild-type                  | 27       | 28 ± 2.5                | 1.3 ± 0.28                 | 0.047 ± 0.012                  |                        |                          |                  |
| Male <i>Esr1</i> knockout       | 6        | 29 ± 3.1                | 1.2 ± 0.27                 | 0.041 ± 0.0079                 |                        |                          |                  |
| Male LERKO                      | 3        | 27 ± 5.9                | 1.4 ± 0.48                 | 0.051 ± 0.011                  |                        |                          |                  |

Abbreviations: E<sub>2</sub>, 17 $\beta$ -estradiol; *Esr1*, estrogen receptor- $\alpha$ ; LERKO, liver estrogen receptor- $\alpha$  knockout; *Esr2*, estrogen receptor- $\beta$ . \*Uterine weight was determined for 6 ovariectomized mice. \*\*Serum estrogen levels were measured in 34 of the wild-type females, in 5 of the animals in the ovariectomy plus estrogen group, in 4 of the animals that were ovariectomized, and in 12 of the *Esr2*KO female mice. Body weight, liver weight, liver/body ratio, uterus weight and serum estrogen levels are shown as the mean  $\pm$  standard deviation. Statistical analysis was carried out separately for male and female groups. Pairwise comparison using Wilcoxon rank sum test (2-sided) with correction for multiple samples (FDR) was used to test for differences and a  $P < 0.05$  was considered significant. Different letters indicate statistically significant differences between groups. The female wild-type group is composed of intact C57BL/6J (B6) females, B6 females that underwent a sham operation (with or without subcutaneous placebo), as well as wild-type littermates of *Esr1*, *Esr2*, and LERKO mice. Serum was not collected from the LERKO females or their wild-type littermates. The *Esr1* and *Esr2* knockout female groups consist of both intact and mice that underwent a sham operation. The wild-type male group is composed of B6 males as well as wild-type littermates of *Esr1*, *Esr2*, and the LERKO mice.

**Table S4.** Transcripts expressed differentially in C57BL/6J females between the ovariectomized group vs. the ovariectomy plus 17 $\beta$ -estradiol add-back group and corresponding sex-specific and estrogen receptor- $\alpha$  dependent expression.

|                | Ovariectomy vs. Ovariectomy plus 17 $\beta$ -estradiol |                           | Wild-type females vs. Wild-type males |                            | Wild-type females vs. <i>Esr1</i> KO females |                           |
|----------------|--------------------------------------------------------|---------------------------|---------------------------------------|----------------------------|----------------------------------------------|---------------------------|
|                | Fold Change                                            | Adjusted <i>p</i> -value  | Fold Change                           | Adjusted <i>p</i> -value   | Fold Change                                  | Adjusted <i>p</i> -value  |
| <i>Tff3</i>    | 34                                                     | $p = 1.29 \times 10^{-5}$ | Male > Female 8.6                     | $p = 2.68 \times 10^{-11}$ | <i>Esr1</i> KO > WT 6.0                      | $p = 3.27 \times 10^{-6}$ |
| 2810439F02Rik  | 31                                                     | $p = 9.82 \times 10^{-5}$ | Male > Female 5.1                     | $p = 0.0022$               | <i>Esr1</i> KO > WT 3.8                      | $p = 0.0022$              |
| <i>Osblp3</i>  | 7.7                                                    | $p = 0.027$               | Male > Female 2.8                     | $p = 0.00021$              | <i>Esr1</i> KO > WT 3.8                      | $p = 0.00020$             |
| <i>Akr1c18</i> | 6.4                                                    | $p = 0.049$               | Female > Male 4.3                     | $p = 1.18 \times 10^{-7}$  | WT > <i>Esr1</i> KO 3.1                      | $p = 0.0016$              |
| <i>Epdr1</i>   | 5.9                                                    | $p = 0.00025$             | Female > Male 2.4                     | $p = 7.67 \times 10^{-7}$  | N/A                                          | $p > 0.05$                |
| EG627821       | 4.8                                                    | $p = 0.0078$              | Male > Female 2.2                     | $p = 2.42 \times 10^{-5}$  | N/A                                          | $p > 0.05$                |
| <i>Cyp7b1</i>  | 4.5                                                    | $p = 0.0073$              | Male > Female 6.3                     | $p = 4.27 \times 10^{-17}$ | <i>Esr1</i> KO > WT 2.9                      | $p = 5.08 \times 10^{-6}$ |
| <i>Bmper</i>   | 4.1                                                    | $p = 0.0013$              | Female > Male 3.8                     | $p = 8.89 \times 10^{-15}$ | N/A                                          | $p > 0.05$                |

| Higher in ovariectomy | Fold Change | Adjusted <i>p</i> -value | Fold Change   | Adjusted <i>p</i> -value | Fold Change        | Adjusted <i>p</i> -value |
|-----------------------|-------------|--------------------------|---------------|--------------------------|--------------------|--------------------------|
| <i>Hspa1a</i>         | 6.3         | <i>p</i> = 0.046         | Male > Female | 2.7 <i>p</i> = 0.0013    | <i>Esr1KO</i> > WT | 3.6 <i>p</i> = 0.0017    |

Abbreviations: *Esr1KO*, estrogen receptor- $\alpha$  knockout; WT, wild-type. Transcripts that differed between the ovariectomy group and the group that received ovariectomy plus 17 $\beta$ -estradiol add-back, that were also either estrogen receptor- $\alpha$  dependent or sex-specific. Fold change represents microarray results from hepatic RNA pools from individual mice sacrificed at 9–10 weeks of age. The 17 $\beta$ -estradiol group is composed of ovariectomized C57BL/6J (B6) mice with 17 $\beta$ -estradiol (0.1 mg pellet) add-back (n = 6). The ovariectomized group is composed of B6 mice that underwent ovariectomy alone (n = 5) or ovariectomy plus placebo (n = 6). The female wild-type (WT) group is composed of intact B6 females (n = 18) and the WT female littermates of the estrogen receptor- $\alpha$  (n = 6) and estrogen receptor- $\beta$  mice (n = 6). WT males are represented by B6 males (n = 15) and WT littermates of estrogen receptor- $\alpha$  (n = 6) and estrogen receptor- $\beta$  mice (n = 6). *Esr1KO* females are represented by intact individuals (n = 6) and females that underwent a sham operation (n = 6).

**Table S5.** Ovarian hormon $\times$ 10-dependent transcripts in C57BL/6J mice which are also dependent on 17 $\beta$ -estradiol.

|                   | Ovariectomy ><br>Intact females |                                           | Ovariectomy ><br>Ovariectomy plus<br>17 $\beta$ -estradiol |                                           |
|-------------------|---------------------------------|-------------------------------------------|------------------------------------------------------------|-------------------------------------------|
|                   | Fold<br>Change                  | Adjusted<br><i>p</i> -value               | Fold Change                                                | Adjusted<br><i>p</i> -value               |
| 1) <i>Ascc3l1</i> | 13                              | <i>p</i> = 0.00027                        | 17                                                         | <i>p</i> = 0.0095                         |
| 2) AK048398       | 12                              | <i>p</i> = 8.62 $\times$ 10 <sup>-6</sup> | 12                                                         | <i>p</i> = 0.0029                         |
| 3) <i>Ppp1r1a</i> | 8.7                             | <i>p</i> = 0.00016                        | 8.4                                                        | <i>p</i> = 0.027                          |
| 4) <i>Lphn3</i>   | 6.9                             | <i>p</i> = 0.00014                        | 6.7                                                        | <i>p</i> = 0.023                          |
| 5) <i>Myb</i>     | 5.6                             | <i>p</i> = 0.00081                        | 6.0                                                        | <i>p</i> = 0.042                          |
| 6) AK033751       | 5.6                             | <i>p</i> = 0.00014                        | 5.6                                                        | <i>p</i> = 0.018                          |
| 7) <i>Nipbl</i>   | 5.6                             | <i>p</i> = 1.27 $\times$ 10 <sup>-8</sup> | 5.6                                                        | <i>p</i> = 4.09 $\times$ 10 <sup>-5</sup> |
| 8) <i>Nefl</i>    | 4.9                             | <i>p</i> = 0.00014                        | 5.0                                                        | <i>p</i> = 0.018                          |
| 9) AK036362       | 4.6                             | <i>p</i> = 3.11 $\times$ 10 <sup>-9</sup> | 4.7                                                        | <i>p</i> = 1.20 $\times$ 10 <sup>-5</sup> |
| 10) 4930522N08Rik | 3.4                             | <i>p</i> = 9.94 $\times$ 10 <sup>-5</sup> | 3.3                                                        | <i>p</i> = 0.018                          |
| 11) D930020E02Rik | 2.4                             | <i>p</i> = 1.93 $\times$ 10 <sup>-5</sup> | 2.4                                                        | <i>p</i> = 0.0045                         |
| 12) <i>Edil3</i>  | 2.3                             | <i>p</i> = 4.15 $\times$ 10 <sup>-5</sup> | 2.4                                                        | <i>p</i> = 0.0063                         |
| 13) A730076H11Rik | 2.3                             | <i>p</i> = 0.00091                        | 2.5                                                        | <i>p</i> = 0.027                          |

  

|                  | Intact females ><br>Ovariectomy |                                           | Ovariectomy plus<br>17 $\beta$ -estradiol ><br>Ovariectomy |                             |
|------------------|---------------------------------|-------------------------------------------|------------------------------------------------------------|-----------------------------|
|                  | Fold<br>Change                  | Adjusted<br><i>p</i> -value               | Fold Change                                                | Adjusted<br><i>p</i> -value |
| 1) 2610018I03Rik | 2.4                             | <i>p</i> = 3.71 $\times$ 10 <sup>-5</sup> | 2.8                                                        | <i>p</i> = 0.0010           |
| 2) <i>Ard1</i>   | 2.3                             | <i>p</i> = 0.00019                        | 2.3                                                        | <i>p</i> = 0.019            |
| 3) <i>Nmd3</i>   | 2.3                             | <i>p</i> = 0.00014                        | 2.2                                                        | <i>p</i> = 0.011            |
| 4) <i>Vps13b</i> | 2.1                             | <i>p</i> = 3.94 $\times$ 10 <sup>-7</sup> | 2.1                                                        | <i>p</i> = 0.00029          |

Transcripts that are altered with ovariectomy and also dependent on 17 $\beta$ -estradiol add-back. Fold change represents microarray results from hepatic RNA pools from individual C57BL/6J (B6) mice sacrificed at 9–10 weeks of age. The female intact group is composed of B6 females (n = 18), and the wild-type littermates of the estrogen receptor- $\alpha$  (n = 6) and estrogen receptor- $\beta$  (n = 6) mice. The ovariectomized group is composed of B6 mice that underwent ovariectomy alone (n = 5) or ovariectomy plus a subcutaneous placebo pellet (n = 6). The ovariectomy plus 17 $\beta$ -estradiol group is composed of ovariectomized mice with subcutaneous estrogen (0.1 mg pellet) add-back (n = 6).

**Table S6.** Transcripts with at least 2-fold differential expression between LERKO females and wild-type females and corresponding sex-specific expression.

|                   | (B6;FVB background)<br>WT females vs.<br>LERKO females |                             | (B6;FVB background)<br>WT females vs. WT males |                             | (B6 background)<br>WT females vs. WT males |                                            |
|-------------------|--------------------------------------------------------|-----------------------------|------------------------------------------------|-----------------------------|--------------------------------------------|--------------------------------------------|
|                   | Fold<br>Change                                         | Adjusted<br><i>p</i> -value | Fold<br>Change                                 | Adjusted<br><i>p</i> -value | Fold<br>Change                             | Adjusted<br><i>p</i> -value                |
| 1) <i>Ifi202b</i> | 27                                                     | <i>p</i> = 0.0038           | Fem > Male: 10 $\times$                        | <i>p</i> = 0.025            | N/A                                        | <i>p</i> > 0.05                            |
| 2) 3110004L20Rik  | 8.7                                                    | <i>p</i> = 0.0034           | Fem > Male: 7.9 $\times$                       | <i>p</i> = 0.011            | N/A                                        | <i>p</i> > 0.05                            |
| 3) 4930573O21Rik  | 6.2                                                    | <i>p</i> = 0.0037           | N/A                                            | <i>p</i> > 0.05             | Male > Fem: 1.9 $\times$                   | <i>p</i> = 0.016                           |
| 4) <i>Esr1</i>    | 6.0                                                    | <i>p</i> = 0.00015          | Fem > Male: 3.1 $\times$                       | <i>p</i> = 0.014            | Fem > Male: 4.4 $\times$                   | <i>p</i> = 2.78 $\times$ 10 <sup>-16</sup> |
| 5) LOC14210       | 5.9                                                    | <i>p</i> = 0.0025           | N/A                                            | <i>p</i> > 0.05             | N/A                                        | <i>p</i> > 0.05                            |
| 6) <i>Gabra3</i>  | 5.8                                                    | <i>p</i> = 0.0014           | Fem > Male: 4.6 $\times$                       | <i>p</i> = 0.0013           | N/A                                        | <i>p</i> > 0.05                            |

|                     |     |               |                      |                           |                      |                           |
|---------------------|-----|---------------|----------------------|---------------------------|----------------------|---------------------------|
| 7) <i>Slit2</i>     | 5.7 | $p = 0.00061$ | N/A                  | $p > 0.05$                | N/A                  | $p > 0.05$                |
| 8) <i>Tnfrsf9</i>   | 5.1 | $p = 0.034$   | N/A                  | $p > 0.05$                | N/A                  | $p > 0.05$                |
| 9) AK033775         | 4.7 | $p = 0.033$   | N/A                  | $p > 0.05$                | N/A                  | $p > 0.05$                |
| 10) <i>Dbc1</i>     | 4.7 | $p = 0.0057$  | Fem > Male: 2.8<br>× | $p = 0.040$               | N/A                  | $p > 0.05$                |
| 11) AK086393        | 4.6 | $p = 0.028$   | N/A                  | $p > 0.05$                | N/A                  | $p > 0.05$                |
| 12) <i>Vdr</i>      | 4.2 | $p = 0.019$   | N/A                  | $p > 0.05$                | N/A                  | $p > 0.05$                |
| 13) <i>Ccr3</i>     | 3.7 | $p = 0.038$   | N/A                  | $p > 0.05$                | N/A                  | $p > 0.05$                |
| 14) <i>Txlnb</i>    | 3.4 | $p = 0.034$   | N/A                  | $p > 0.05$                | N/A                  | $p > 0.05$                |
| 15) 4933426K21Rik   | 3.4 | $p = 0.0078$  | N/A                  | $p > 0.05$                | N/A                  | $p > 0.05$                |
| 16) NAP027952-1     | 3.2 | $p = 0.0062$  | N/A                  | $p > 0.05$                | N/A                  | $p > 0.05$                |
| 17) <i>Pcdh19</i>   | 3.2 | $p = 0.033$   | N/A                  | $p > 0.05$                | N/A                  | $p > 0.05$                |
| 18) <i>Ptgfr</i>    | 3.2 | $p = 0.0019$  | Fem > Male: 2.8<br>× | $p = 0.0013$              | N/A                  | $p > 0.05$                |
| 19) <i>Olfr1294</i> | 3.0 | $p = 0.040$   | N/A                  | $p > 0.05$                | N/A                  | $p > 0.05$                |
| 20) <i>Ptprr</i>    | 3.0 | $p = 0.015$   | N/A                  | $p > 0.05$                | N/A                  | $p > 0.05$                |
| 21) 1500015O10Rik   | 2.9 | $p = 0.0079$  | N/A                  | $p > 0.05$                | N/A                  | $p > 0.05$                |
| 22) <i>Pdzrn3</i>   | 2.9 | $p = 0.015$   | N/A                  | $p > 0.05$                | Fem > Male: 1.5<br>× | $p = 0.018$               |
| 23) 1110028C15Rik   | 2.8 | $p = 0.00071$ | N/A                  | $p > 0.05$                | N/A                  | $p > 0.05$                |
| 24) AK019816        | 2.8 | $p = 0.020$   | N/A                  | $p > 0.05$                | N/A                  | $p > 0.05$                |
| 25) AK029741        | 2.7 | $p = 0.0084$  | N/A                  | $p > 0.05$                | N/A                  | $p > 0.05$                |
| 26) <i>Dpep2</i>    | 2.7 | $p = 0.0088$  | N/A                  | $p > 0.05$                | N/A                  | $p > 0.05$                |
| 27) <i>Ccdc68</i>   | 2.7 | $p = 0.016$   | Fem > Male: 6.1<br>× | $p = 9.36 \times 10^{-9}$ | Fem > Male: 1.8<br>× | $p = 0.00017$             |
| 28) A930037H05Rik   | 2.6 | $p = 0.049$   | N/A                  | $p > 0.05$                | N/A                  | $p > 0.05$                |
| 29) <i>Calb1</i>    | 2.6 | $p = 0.030$   | N/A                  | $p > 0.05$                | Male > Fem: 1.6<br>× | $p = 0.045$               |
| 30) <i>Hsd11b2</i>  | 2.5 | $p = 0.015$   | N/A                  | $p > 0.05$                | N/A                  | $p > 0.05$                |
| 31) <i>Cd34</i>     | 2.4 | $p = 0.028$   | Fem > Male: 2.1<br>× | $p = 0.024$               | Fem > Male: 1.8<br>× | $p = 5.99 \times 10^{-5}$ |
| 32) <i>Cd200r3</i>  | 2.4 | $p = 0.019$   | N/A                  | $p > 0.05$                | N/A                  | $p > 0.05$                |
| 33) <i>Tub</i>      | 2.4 | $p = 0.00012$ | N/A                  | $p > 0.05$                | N/A                  | $p > 0.05$                |
| 34) <i>Kcne1</i>    | 2.3 | $p = 0.011$   | N/A                  | $p > 0.05$                | N/A                  | $p > 0.05$                |
| 35) <i>Lbxcor1</i>  | 2.3 | $p = 0.028$   | N/A                  | $p > 0.05$                | N/A                  | $p > 0.05$                |
| 36) <i>Rasa1</i>    | 2.3 | $p = 0.016$   | N/A                  | $p > 0.05$                | N/A                  | $p > 0.05$                |
| 37) <i>Tigd4</i>    | 2.2 | $p = 0.034$   | N/A                  | $p > 0.05$                | N/A                  | $p > 0.05$                |
| 38) <i>Chgb</i>     | 2.2 | $p = 0.0038$  | N/A                  | $p > 0.05$                | N/A                  | $p > 0.05$                |
| 39) AF087578        | 2.1 | $p = 0.016$   | Fem > Male: 1.8<br>× | $p = 0.018$               | N/A                  | $p > 0.05$                |
| 40) <i>Prl5a1</i>   | 2.1 | $p = 0.011$   | N/A                  | $p > 0.05$                | N/A                  | $p > 0.05$                |
| 41) <i>Gpm6a</i>    | 2.0 | $p = 0.023$   | N/A                  | $p > 0.05$                | N/A                  | $p > 0.05$                |

  

| Higher in LERKO females | (B6;FVB background)<br>WT females vs.<br>LERKO females |                           | (B6;FVB background)<br>WT females vs. WT males |                     | (B6 background)<br>WT females vs. WT males |                     |
|-------------------------|--------------------------------------------------------|---------------------------|------------------------------------------------|---------------------|--------------------------------------------|---------------------|
|                         | Fold Change                                            | Adjusted $p$ -value       | Fold Change                                    | Adjusted $p$ -value | Fold Change                                | Adjusted $p$ -value |
| 1) <i>Ms4a4b</i>        | 15                                                     | $p = 0.0090$              | Fem > Male: 1.7<br>×                           | $p = 0.017$         | Fem > Male: 1.6<br>×                       | $p = 0.0030$        |
| 2) <i>Stx3</i>          | 7.1                                                    | $p = 0.00020$             | Male > Fem: 2.9x                               | $p = 0.044$         | N/A                                        | $p > 0.05$          |
| 3) AK086941             | 6.5                                                    | $p = 1.39 \times 10^{-6}$ | Male > Fem: 2.4<br>×                           | $p = 0.035$         | N/A                                        | $p > 0.05$          |
| 4) D230034L24Rik        | 4.6                                                    | $p = 0.0062$              | N/A                                            | $p > 0.05$          | N/A                                        | $p > 0.05$          |
| 5) <i>Hbb-b1</i>        | 4.3                                                    | $p = 0.023$               | N/A                                            | $p > 0.05$          | N/A                                        | $p > 0.05$          |
| 6) <i>Tanc2</i>         | 4.2                                                    | $p = 0.036$               | Male > Fem: 3.3<br>×                           | $p = 0.035$         | N/A                                        | $p > 0.05$          |
| 7) <i>Gja5</i>          | 4.1                                                    | $p = 0.019$               | Male > Fem: 5.8<br>×                           | $p = 0.00011$       | N/A                                        | $p > 0.05$          |
| 8) 4921511K06Rik        | 3.8                                                    | $p = 0.0067$              | N/A                                            | $p > 0.05$          | N/A                                        | $p > 0.05$          |
| 9) <i>Styx11</i>        | 3.6                                                    | $p = 0.028$               | Male > Fem: 2.8<br>×                           | $p = 0.033$         | N/A                                        | $p > 0.05$          |
| 10) AK041868            | 3.5                                                    | $p = 0.033$               | N/A                                            | $p > 0.05$          | N/A                                        | $p > 0.05$          |

|                        |     |                           |                      |                           |                      |                            |
|------------------------|-----|---------------------------|----------------------|---------------------------|----------------------|----------------------------|
| 11) 6330549D23Rik      | 3.3 | $p = 0.034$               | Male > Fem: 4.4<br>× | $p = 0.00034$             | N/A                  | $p > 0.05$                 |
| 12) <i>Rims4</i>       | 3.3 | $p = 0.025$               | N/A                  | $p > 0.05$                | N/A                  | $p > 0.05$                 |
| 13) ENSMUSG00000060915 | 3.3 | $p = 0.0038$              | N/A                  | $p > 0.05$                | N/A                  | $p > 0.05$                 |
| 14) <i>Gjb4</i>        | 3.2 | $p = 0.028$               | N/A                  | $p > 0.05$                | N/A                  | $p > 0.05$                 |
| 15) <i>Ankrd2</i>      | 3.1 | $p = 0.012$               | N/A                  | $p = 0.0078$              | N/A                  | $p > 0.05$                 |
| 16) 1700016B15Rik      | 2.9 | $p = 0.018$               | N/A                  | $p > 0.05$                | N/A                  | $p > 0.05$                 |
| 17) AK029708           | 2.8 | $p = 0.020$               | N/A                  | $p > 0.05$                | N/A                  | $p > 0.05$                 |
| 18) AK037078           | 2.8 | $p = 0.016$               | N/A                  | $p > 0.05$                | N/A                  | $p > 0.05$                 |
| 19) 9430022F06Rik      | 2.7 | $p = 0.028$               | N/A                  | $p > 0.05$                | N/A                  | $p > 0.05$                 |
| 20) AK088873           | 2.7 | $p = 0.0021$              | N/A                  | $p > 0.05$                | N/A                  | $p > 0.05$                 |
| 21) <i>Pvr</i>         | 2.7 | $p = 0.023$               | Fem > Male: 2.4<br>× | $p = 6.25 \times 10^{-8}$ | Fem > Male: 1.9<br>× | $p = 6.52 \times 10^{-15}$ |
| 22) <i>Pax1</i>        | 2.5 | $p = 0.028$               | Fem > Male: 3.5<br>× | $p = 0.035$               | N/A                  | $p > 0.05$                 |
| 23) <i>Npc1</i>        | 2.4 | $p = 2.31 \times 10^{-7}$ | N/A                  | $p > 0.05$                | N/A                  | $p > 0.05$                 |
| 24) AK040918           | 2.4 | $p = 0.016$               | N/A                  | $p > 0.05$                | N/A                  | $p > 0.05$                 |
| 25) 6430562O15Rik      | 2.3 | $p = 0.028$               | N/A                  | $p > 0.05$                | N/A                  | $p > 0.05$                 |
| 26) <i>Pan3</i>        | 2.2 | $p = 0.015$               | N/A                  | $p > 0.05$                | N/A                  | $p > 0.05$                 |
| 27) AK039103           | 2.1 | $p = 0.0026$              | N/A                  | $p > 0.05$                | N/A                  | $p > 0.05$                 |
| 28) <i>Ctsf</i>        | 2.1 | $p = 0.018$               | N/A                  | $p > 0.05$                | N/A                  | $p > 0.05$                 |
| 29) 5730507N06Rik      | 2.0 | $p = 0.023$               | Male > Fem: 1.9<br>× | $p = 0.015$               | N/A                  | $p > 0.05$                 |

Abbreviations: B6, C57BL/6J; WT, wild-type; LERKO, liver estrogen receptor- $\alpha$  knockout. Fold change represents microarray results from hepatic RNA of mice sacrificed at 9–10 weeks of age. The adjusted  $p$ -value for each transcript is listed. For the LERKO females vs. WT females (B6;FVB) comparison, and the WT sex-specific (B6;FVB background) comparison, these results are from three individual animals from each group. The B6;FVB WT animals were littermates of the LERKO animals. The WT sex-specific (B6 background) comparison represent pools of hepatic RNA. The female B6 WT group is composed of B6 females ( $n = 18$ ) and the WT female littermates of the global estrogen receptor- $\alpha$  ( $n = 6$ ) and estrogen receptor- $\beta$  mice ( $n = 6$ ). The B6 WT males group is composed of B6 males ( $n = 15$ ) and the WT male littermates of the global estrogen receptor- $\alpha$  ( $n = 6$ ) and estrogen receptor- $\beta$  ( $n = 6$ ) mice.

**Table S7.** Quantitative real-time PCR primers used to measure hepatic mRNA levels in global estrogen receptor- $\alpha$  knockout females and wild-type littermates.

| Gene Symbol | Primer Sequence (5'-3')        | Accession Number | Efficiency | Amplicon (bp) |
|-------------|--------------------------------|------------------|------------|---------------|
| <i>Actb</i> | F) 5'-CCCTGAGGGTCTTTTCCAG-3    | NM_007393.1      | 2.0        | 53            |
|             | R) 5'-GGATGCCACAGGAT-TCCATA-3' |                  |            |               |
| <i>Fmo3</i> | F) 5'-AACTATGGTTTGCTGCTTT-3'   | NM_008030.1      | 2.1        | 54            |
|             | R) 5'-ATTGAACACGGGCTCTTT-3'    |                  |            |               |

|                  |                                                                          |                                |     |    |
|------------------|--------------------------------------------------------------------------|--------------------------------|-----|----|
| <i>Sult3a1</i>   | F) 5'-TGCAAACATTTCTA-<br>GATGGAG-3'<br>R) 5'-TACCAGCCTCTTATGTGGTC-<br>3' | NM_020565.1                    | 2.1 | 64 |
| <i>3β-Hsd4/5</i> | F) 5'-TCCAGACAGAC-<br>CATCCTAGA-3'<br>R) 5'-ACACAAGCATCCAGTAG-<br>GAG-3' | NM_001111336.1/<br>NM_008295.1 | 1.8 | 62 |
| <i>Cyp4a12</i>   | F) 5'-CTCATTCCTGCCCTTCTC-3'<br>R) 5'-AGCTCATTCATCGCAAAC-3'               | NM_172306.1                    | 2.2 | 66 |

Abbreviations: *Actb*, β-actin; *Fmo3*, flavin-containing monooxygenase 3; *Sult3a1*, sulfotransferase 3a1; *3β-Hsd4/5*, 3β-hydroxysteroid dehydrogenase 4/5; *Cyp4a12*, cytochrome p450 4a12.
